# Supplementary material for: Plasmodiophora brassicae-Triggered Cell Enlargement and Loss of Cellular Integrity in Root Systems Are Mediated by Pectin Demethylation
Source: PubMed Central journal article supplement (PMC8359924; doi:10.3389/fpls.2021.711838), 2021-07-29
Supplement: Table_1.pdf [file Table_1.pdf]

**Table S1** List of primer sequences

| <b>Primers used in testing the SALK line</b>         |                              |                          |
|------------------------------------------------------|------------------------------|--------------------------|
| Target sequence                                      | Forward primer               | Reverse Primer           |
| LBb1.3 = left border of the T-DNA insertion sequence | ATTTTGCCGATTTTCGGAAC         | -                        |
| Genomic primers for <i>pme18-1</i> (SALK_076975)     | GTCAATGGATCGGATCAGATG        | TCCTCCATCGAACTCATCATC    |
| <i>PP2A</i> ( <i>At1g13320</i> )                     | TCCGAGATCACATGTTCCAAA<br>CTC | CCGTATCATGTTCTCCACAACC G |
| <b>RT-qPCR primers</b>                               |                              |                          |
| Target gene                                          | Forward primer               | Reverse Primer           |
| <i>PME18</i> ( <i>At1g11580</i> )                    | CACGCTCTACACTCACACGT         | GTGATGTAGCTGTCGCGGTA     |
| <i>TIP41</i> ( <i>At4g34270</i> )                    | TGAACTGGCTGACAATGGAGTG       | CATGAGCTTGGCATGACTCTCAC  |
| <i>UBC9</i> ( <i>At4g27960</i> )                     | TCCTACTTCATGTAGCGCAGGAC      | TCCTCCAGAATAAGGGCTATCCG  |
| <i>PP2A</i> ( <i>At1g13320</i> )                     | TCCGAGATCACATGTTCCAAA<br>CTC | CCGTATCATGTTCTCCACAACC G |
